# Supplementary material
Source: PubMed Central journal article supplement (PMC8689663)
Supplement: cri_42_5_369_esm1.pdf [file cri_42_5_369_esm1.pdf]

## Electronic Supplementary Material 1

**Table E1**

*Population characteristics of 13-14-year-olds participating in the Amsterdam youth health monitor for school years 2010-2011 until 2014-2015.*

|                               | <b>2010</b> | <b>2011</b> | <b>2012</b> | <b>2013</b> | <b>2014</b> | <b>Total</b> |
|-------------------------------|-------------|-------------|-------------|-------------|-------------|--------------|
| <b>Participants (n)</b>       | 5,210       | 5,420       | 4,888       | 5,865       | 4,890       | 26,273       |
| <b>Age</b>                    |             |             |             |             |             |              |
| Mean                          | 13.6        | 13.6        | 13.7        | 13.6        | 13.5        | 13.6         |
| SD                            | 0.7         | 0.6         | 0.7         | 0.6         | 0.7         | 0.7          |
| <b>Sex (%)</b>                |             |             |             |             |             |              |
| Boys                          | 48.5        | 49.2        | 49.4        | 48.4        | 51.6        | 49.4         |
| Girls                         | 51.5        | 50.8        | 50.6        | 51.6        | 48.4        | 50.6         |
| <b>Ethnicity (%)</b>          |             |             |             |             |             |              |
| Dutch                         | 34.9        | 33.6        | 34.2        | 34.6        | 33.9        | 34.2         |
| Surinamese                    | 13.6        | 12.3        | 12.3        | 12.7        | 11.5        | 12.5         |
| Turkish                       | 10.2        | 10.7        | 10.0        | 9.3         | 9.4         | 9.9          |
| Moroccan                      | 18.0        | 18.7        | 17.8        | 18.4        | 20.0        | 18.6         |
| <i>Other</i>                  | 23.3        | 24.8        | 25.6        | 25.1        | 25.1        | 24.8         |
| <b>Family composition (%)</b> |             |             |             |             |             |              |
| Father and mother             | 66.0        | 68.3        | 66.9        | 66.4        | 66.9        | 66.9         |
| Parent and partner            | 3.8         | 3.2         | 3.3         | 4.6         | 4.3         | 3.9          |
| Co-parenting                  | 6.9         | 6.8         | 7.7         | 7.8         | 7.6         | 7.4          |
| Single-parent family          | 21.9        | 20.4        | 20.7        | 19.7        | 20.0        | 20.5         |
| <i>Other</i>                  | 1.4         | 1.3         | 1.5         | 1.4         | 1.1         | 1.4          |
| <b>Educational level (%)</b>  |             |             |             |             |             |              |
| Practical pre-vocational      | 20.6        | 21.2        | 22.5        | 22.0        | 22.9        | 21.8         |
| Theoretical pre-vocational    | 22.2        | 21.4        | 19.7        | 19.3        | 19.0        | 20.3         |
| Senior general secondary      | 12.0        | 12.5        | 14.9        | 13.0        | 15.7        | 13.6         |
| Pre-university                | 26.3        | 26.7        | 26.4        | 25.8        | 27.2        | 26.4         |
| <i>Mixed-level-education</i>  | 18.8        | 18.2        | 16.6        | 19.9        | 15.2        | 17.8         |

**Table E2**

*Suicidal thoughts and suicide attempts reported by 13-14-year-olds participating in the Amsterdam youth health monitor, in total as stratified by sociodemographic characteristics, for school years 2010-2011 until 2014-2015.*

|                                    | 2010   | 2011   | 2012   | 2013   | 2014   | Total  |
|------------------------------------|--------|--------|--------|--------|--------|--------|
| <b>SUICIDAL THOUGHTS (%)</b>       | 17.8   | 16.2   | 14.7   | 15.2   | 12.7   | 15.4   |
| <b>Sex</b> <i>P</i>                | <0.001 | <0.001 | <0.001 | <0.001 | <0.001 | <0.001 |
| Boys                               | 11.5   | 10.8   | 9.6    | 10.0   | 7.9    | 10.0   |
| Girls                              | 23.7   | 21.3   | 19.7   | 20.1   | 17.7   | 20.6   |
| <b>Ethnicity</b> <i>P</i>          | <0.001 | <0.001 | <0.001 | <0.001 | <0.001 | <0.001 |
| Dutch                              | 17.7   | 16.3   | 15.2   | 18.3   | 14.5   | 16.5   |
| Surinamese                         | 24.7   | 19.2   | 19.3   | 15.6   | 16.5   | 19.1   |
| Turkish                            | 17.0   | 15.3   | 14.9   | 10.6   | 9.4    | 13.5   |
| Moroccan                           | 11.8   | 9.3    | 8.2    | 8.3    | 5.4    | 8.6    |
| <i>Other</i>                       | 18.9   | 19.9   | 16.2   | 17.5   | 15.5   | 17.7   |
| <b>Family composition</b> <i>P</i> | <0.001 | <0.001 | <0.001 | <0.001 | <0.001 | <0.001 |
| Father and mother                  | 15.0   | 14.2   | 12.2   | 13.8   | 10.2   | 13.2   |
| Parent and partner                 | 29.6   | 23.5   | 24.7   | 22.1   | 22.3   | 24.3   |
| Co-parenting                       | 15.8   | 18.0   | 18.9   | 17.0   | 15.9   | 17.1   |
| Single-parent family               | 23.7   | 20.2   | 18.1   | 16.7   | 17.4   | 19.3   |
| <i>Other</i>                       | 36.0   | 24.7   | 36.6   | 26.2   | 21.4   | 29.2   |
| <b>Educational level</b> <i>P</i>  | <0.001 | 0.009  | <0.001 | 0.232  | 0.004  | <0.001 |
| Practical pre-vocational           | 23.8   | 18.0   | 15.9   | 14.2   | 14.0   | 17.1   |
| Theoretical pre-vocational         | 18.4   | 16.7   | 13.5   | 15.6   | 13.9   | 15.8   |
| Senior general secondary           | 16.8   | 13.8   | 16.8   | 17.4   | 9.9    | 14.9   |
| Pre-university                     | 12.2   | 14.0   | 11.6   | 14.2   | 11.0   | 12.7   |
| <i>Mixed-level-education</i>       | 19.0   | 18.1   | 17.5   | 15.9   | 15.2   | 17.2   |
|                                    |        |        |        |        |        |        |
| <b>SUICIDE ATTEMPTS (%)</b>        | 2.8    | 2.8    | 2.2    | 2.2    | 1.9    | 2.4    |
| <b>Sex</b> <i>P</i>                | <0.001 | <0.001 | <0.001 | <0.001 | <0.001 | <0.001 |
| Boys                               | 1.2    | 1.0    | 1.3    | 1.2    | 1.0    | 1.1    |
| Girls                              | 4.4    | 4.5    | 3.0    | 3.1    | 2.8    | 3.6    |
| <b>Ethnicity</b> <i>P</i>          | 0.008  | 0.001  | 0.021  | 0.054  | 0.002  | <0.001 |
| Dutch                              | 1.9    | 2.1    | 1.6    | 2.5    | 1.4    | 1.9    |
| Surinamese                         | 4.0    | 4.8    | 3.2    | 2.2    | 2.9    | 3.4    |
| Turkish                            | 4.0    | 3.1    | 2.5    | 1.3    | 2.0    | 2.6    |
| Moroccan                           | 2.5    | 1.7    | 1.4    | 1.3    | 0.9    | 1.5    |
| <i>Other</i>                       | 3.4    | 3.3    | 2.9    | 2.8    | 2.9    | 3.1    |
| <b>Family composition</b> <i>P</i> | <0.001 | <0.001 | <0.001 | 0.002  | 0.001  | <0.001 |
| Father and mother                  | 2.2    | 2.0    | 1.6    | 1.8    | 1.5    | 1.8    |
| Parent and partner                 | 5.1    | 5.9    | 4.3    | 3.3    | 4.3    | 4.5    |
| Co-parenting                       | 1.4    | 2.2    | 1.6    | 2.2    | 2.2    | 1.9    |
| Single-parent family               | 4.3    | 4.8    | 3.3    | 2.9    | 2.5    | 3.6    |
| <i>Other</i>                       | 12.0   | 8.2    | 8.5    | 7.1    | 7.1    | 8.6    |
| <b>Educational level</b> <i>P</i>  | <0.001 | <0.001 | <0.001 | 0.088  | <0.001 | <0.001 |
| Practical pre-vocational           | 5.4    | 4.7    | 3.7    | 2.3    | 2.9    | 3.8    |
| Theoretical pre-vocational         | 2.9    | 3.2    | 1.6    | 2.9    | 3.3    | 2.8    |
| Senior general secondary           | 1.9    | 1.5    | 2.5    | 2.8    | 1.6    | 2.1    |
| Pre-university                     | 0.7    | 1.1    | 1.0    | 1.5    | 0.5    | 1.0    |
| <i>Mixed-level-education</i>       | 3.6    | 3.4    | 2.4    | 1.8    | 1.6    | 2.6    |

**Table E3**

Five-year time trends in suicidal thoughts and suicide attempts reported by 13-14-year-olds participating in the Amsterdam youth health monitor, in total as stratified by ethnicity and educational level, for school years 2010-2011 until 2014-2015.

|                                                                  | <i>OR Crude<sup>a</sup></i> | <i>95% CI</i> | <i>P</i> | <i>OR adjusted<sup>b</sup></i> | <i>95% CI</i> | <i>P</i> |
|------------------------------------------------------------------|-----------------------------|---------------|----------|--------------------------------|---------------|----------|
| <b>Suicidal thoughts</b>                                         | 0.92                        | 0.90, 0.94    | <.001    | 0.92                           | 0.90, 0.94    | <.001    |
| <b>Ethnicity</b><br>( <i>Chi-sq 21.6; df 4; p&lt;.001</i> )      |                             |               |          |                                |               |          |
| Dutch                                                            | 0.97                        | 0.93, 1.01    | .164     | 0.98                           | 0.94, 1.02    | .220     |
| Surinamese                                                       | 0.87                        | 0.82, 0.93    | <.001    | 0.87                           | 0.81, 0.93    | <.001    |
| Turkish                                                          | 0.84                        | 0.78, 0.91    | <.001    | 0.83                           | 0.76, 0.90    | <.001    |
| Moroccan                                                         | 0.84                        | 0.78, 0.90    | <.001    | 0.84                           | 0.78, 0.90    | <.001    |
| Other                                                            | 0.94                        | 0.90, 0.98    | .007     | 0.95                           | 0.90, 0.99    | .022     |
| <b>Educational level</b><br>( <i>Chi-sq 17.2; df 4; p=.002</i> ) |                             |               |          |                                |               |          |
| Practical pre-vocational                                         | 0.85                        | 0.81, 0.89    | <.001    | 0.84                           | 0.80, 0.89    | <.001    |
| Theoretical pre-vocational                                       | 0.93                        | 0.88, 0.98    | .004     | 0.91                           | 0.87, 0.97    | .001     |
| Senior general secondary                                         | 0.92                        | 0.86, 0.98    | .013     | 0.92                           | 0.86, 0.99    | .016     |
| Pre-university                                                   | 0.98                        | 0.93, 1.03    | .471     | 0.99                           | 0.94, 1.04    | .603     |
| Mixed-level-education                                            | 0.93                        | 0.88, 0.98    | .012     | 0.95                           | 0.90, 1.01    | .095     |
| <b>Suicide Attempts</b>                                          |                             |               |          |                                |               |          |
|                                                                  | 0.90                        | 0.85, 0.95    | <.001    | 0.90                           | 0.85, 0.96    | .001     |
| <b>Ethnicity</b><br>( <i>Chi-sq 8.6; df 4; p=.07</i> )           |                             |               |          |                                |               |          |
| Dutch                                                            | 0.98                        | 0.88, 1.09    | .668     | 0.97                           | 0.87, 1.08    | .587     |
| Surinamese                                                       | 0.86                        | 0.75, 0.98    | .027     | 0.86                           | 0.75, 0.99    | .036     |
| Turkish                                                          | 0.78                        | 0.65, 0.94    | .008     | 0.77                           | 0.64, 0.93    | .006     |
| Moroccan                                                         | 0.80                        | 0.67, 0.94    | .007     | 0.79                           | 0.67, 0.94    | .007     |
| Other                                                            | 0.95                        | 0.86, 1.06    | .361     | 0.97                           | 0.87, 1.07    | .509     |
| <b>Educational level</b><br>( <i>Chi-sq 15.9; df 4; p=.003</i> ) |                             |               |          |                                |               |          |
| Practical pre-vocational                                         | 0.81                        | 0.73, 0.89    | <.001    | 0.81                           | 0.73, 0.89    | <.001    |
| Theoretical pre-vocational                                       | 1.01                        | 0.90, 1.14    | .812     | 1.02                           | 0.90, 1.14    | .780     |
| Senior general secondary                                         | 1.03                        | 0.87, 1.21    | .769     | 1.03                           | 0.87, 1.22    | .747     |
| Pre-university                                                   | 1.01                        | 0.85, 1.19    | .921     | 1.03                           | 0.87, 1.22    | .757     |
| Mixed-level-education                                            | 0.80                        | 0.70, 0.91    | .001     | 0.80                           | 0.70, 0.92    | .001     |

95% CI 95% confidence interval

<sup>a</sup> Changes per annum

<sup>b</sup> Changes per annum, adjusted for age, sex, ethnicity, family composition and educational level
